# Supplementary material
Source: publisher site journal article supplement (https://www.dovepress.com/article/402715)
Supplement: Supplementary file 1 [file get_supplementary_file.php]

1 **Supplementary Information**

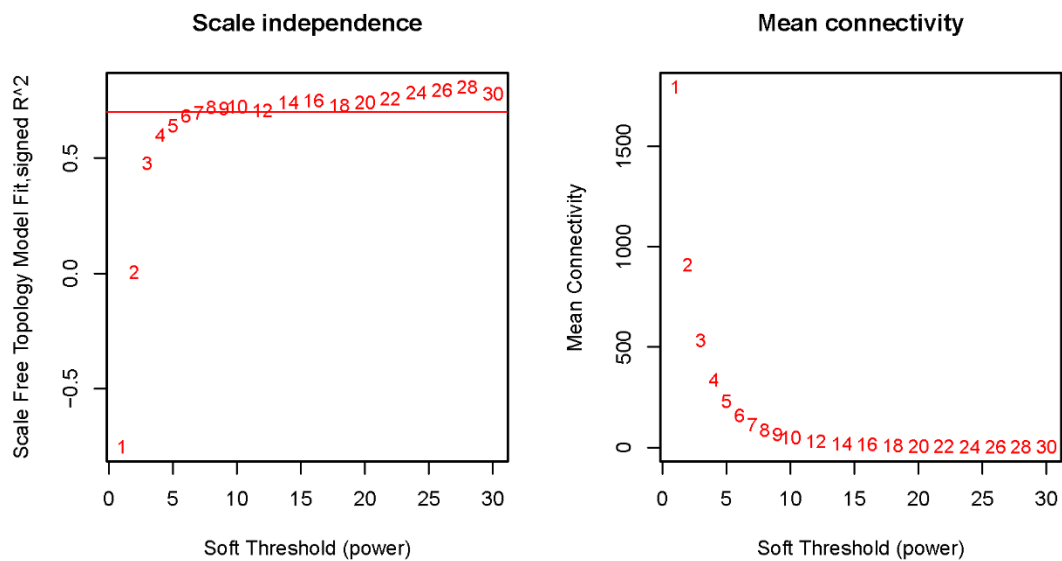

2

3 **Additional file 1: Figure S1.** network topology analysis. Left panel shows scale-free  
4 fit index as a function of soft threshold power, while right panel shows mean  
5 connectivity.

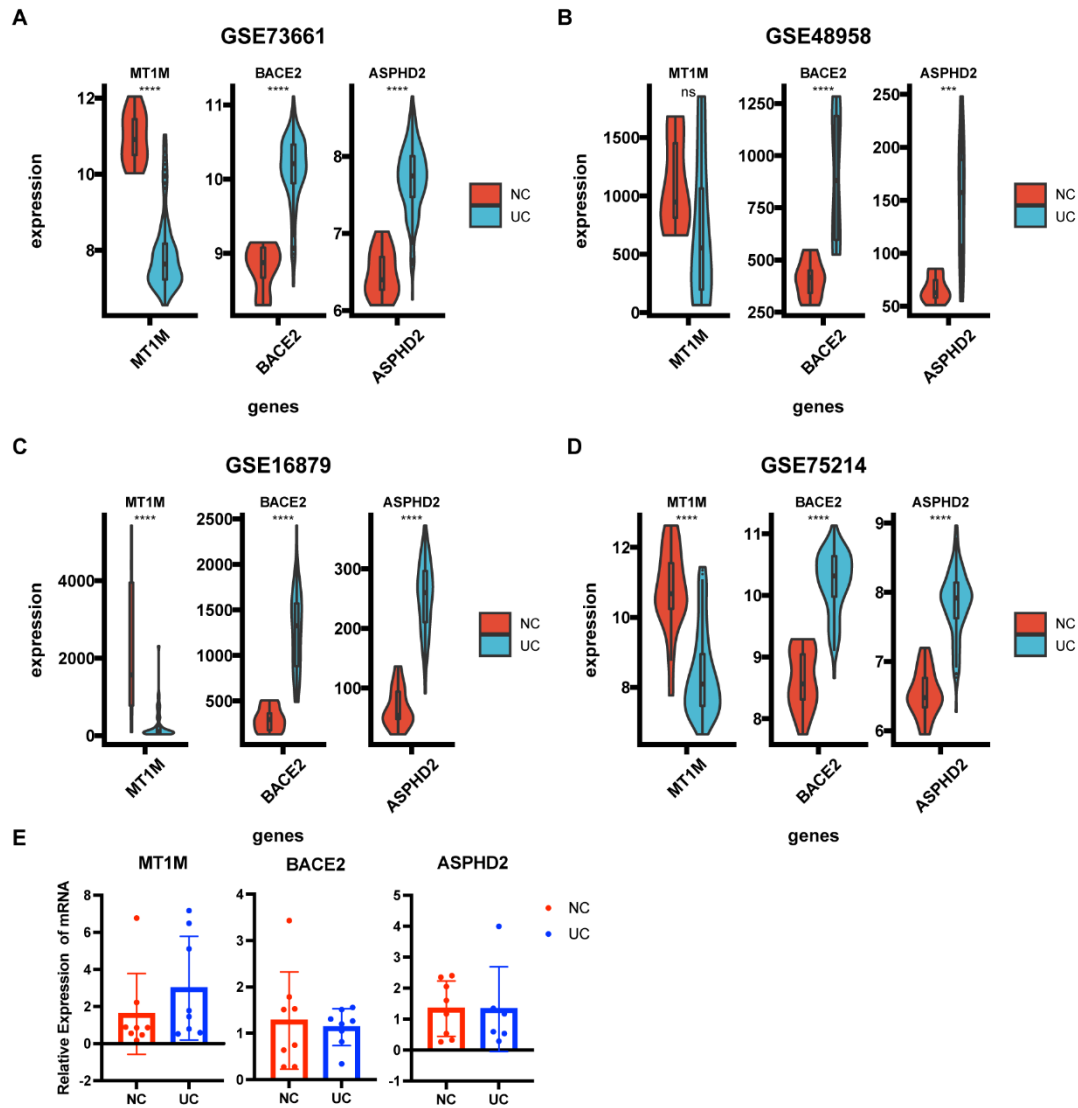

6

7 **Additional file 2: Figure S2.** Identification of the expressions of candidate hub genes.  
 8 The expressions of MT1M, BACE2, and ASPHD2 in GSE73661 (A), GSE48958 (B),  
 9 GSE16879 (C), and GSE75214 (D). (E) qRT-PCR validation of the MT1M, BACE2,  
 10 and ASPHD2. ns, no significance; \*\*\* means  $P < 0.001$ ; \*\*\*\* means  $P < 0.0001$ .

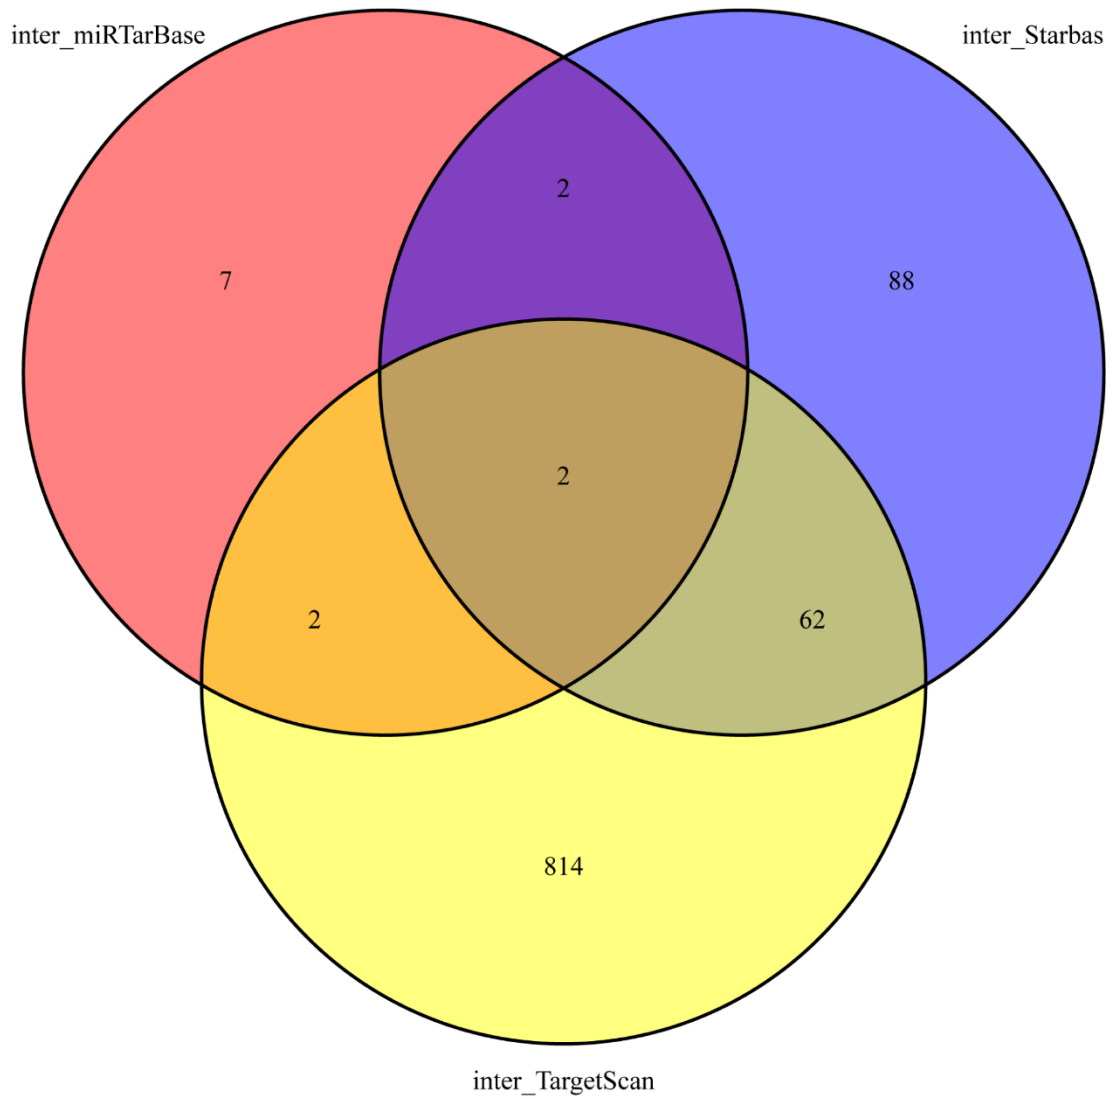

11

12 **Additional file 3: Figure S3** The Venn diagram depicts the overlap between miRNAs  
13 predicted by Starbase, miRTarBase, and TargetScan.
